# Supplementary material for: Pharmacokinetic and subjective assessment of prototype JUUL2 electronic nicotine delivery system in two nicotine concentrations, JUUL system, IQOS, and combustible cigarette
Source: Springer Nature journal article supplement (doi:10.1007/s00213-022-06100-0), 2022-02-20
Supplement: 213_2022_6100_MOESM1_ESM.pdf [file 213_2022_6100_MOESM1_ESM.pdf]

## Supplementary Material File

**Article Title:** Pharmacokinetic and Subjective Assessment of Prototype JUUL2 Electronic Nicotine Delivery System in Two Nicotine Concentrations, JUUL System, IQOS and Combustible Cigarette

**Journal Name:** *Psychopharmacology*

**Authors and Affiliations:** Nicholas I. Goldenson, PhD,<sup>a</sup> Erik M. Augustson, PhD, MPH,<sup>a</sup> Joey Chen, BS,<sup>a</sup> Saul Shiffman, PhD<sup>b</sup>

<sup>a</sup>Juul Labs, Inc.

<sup>b</sup>PinneyAssociates, Inc.

**Corresponding Author:** Nicholas I. Goldenson, Juul Labs, Inc., 1000 F Street NW, Washington, D.C., 20004, e-mail: [nicholas.goldenson@juul.com](mailto:nicholas.goldenson@juul.com)

**Supplementary Figure 1. Schematic of Experimental Design**

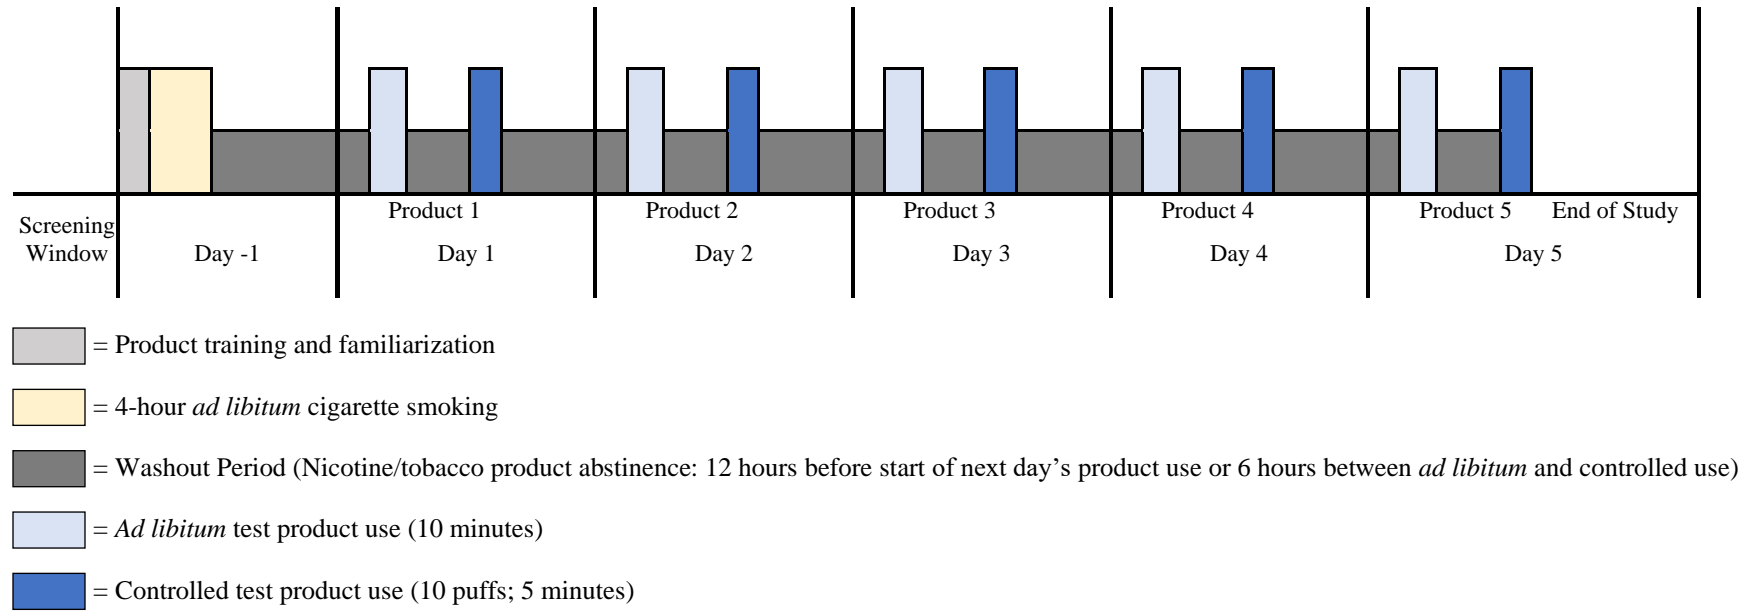

**Supplementary Table 1.** Timeline of Blood Sampling Relative to Test Product Use

| Product Use       | Time of Blood Sampling in Relation to Start of Test Product Use (Minutes) |   |     |   |   |   |   |   |    |    |    |    |    |    |    |
|-------------------|---------------------------------------------------------------------------|---|-----|---|---|---|---|---|----|----|----|----|----|----|----|
|                   | -5                                                                        | 0 | 1.5 | 3 | 5 | 6 | 7 | 8 | 10 | 15 | 30 | 45 | 60 | 75 | 90 |
| Controlled        | ✓                                                                         |   | ✓   | ✓ | ✓ | ✓ | ✓ | ✓ | ✓  | ✓  | ✓  |    | ✓  |    |    |
| <i>Ad Libitum</i> | ✓                                                                         |   | ✓   | ✓ | ✓ | ✓ | ✓ | ✓ | ✓  | ✓  | ✓  | ✓  | ✓  | ✓  | ✓  |

*Note.* Abbreviations: ENDS, electronic nicotine delivery system.

 = Test Product Use

**Supplementary Table 2. PK Session Data in *Ad Libitum* and Controlled Use Conditions**

| Use Condition     | PK Sessions                                           | JUUL 59 mg/mL<br>N (%) | JUUL2 Prototype<br>18 mg/mL<br>N (%) | JUUL2 Prototype<br>40 mg/mL<br>N (%) | IQOS<br>N (%) | UB Cigarette<br>N (%) |
|-------------------|-------------------------------------------------------|------------------------|--------------------------------------|--------------------------------------|---------------|-----------------------|
| <i>Ad Libitum</i> | No. of PK sessions completed                          | 36 (90.0)              | 35 (87.5)                            | 36 (90.0)                            | 38 (95.0)     | 33 (82.5)             |
|                   | No. of PK sessions excluded<br>for missed blood draws | 0 (0.0)                | 2 (2.5)                              | 1 (2.5)                              | 0 (0.0)       | 4 (10.0)              |
|                   | No. of missing sessions due<br>to withdrawal          | 4 (10.0)               | 3 (10.0)                             | 3 (7.5)                              | 2 (2.5)       | 3 (7.5)               |
| Controlled        | No. of PK sessions completed                          | 35 (87.5)              | 37 (92.5)                            | 37 (92.5)                            | 38 (95.0)     | 34 (85.0)             |
|                   | No. of PK sessions excluded<br>for missed blood draws | 1 (2.5)                | 0 (0.0)                              | 0 (0.0)                              | 0 (0.0)       | 2 (5.0)               |
|                   | No. of missing sessions due<br>to withdrawal          | 4 (10.0)               | 3 (7.5)                              | 3 (7.5)                              | 2 (2.5)       | 4 (10.0)              |

*Note.* Abbreviations: UB, usual brand.

N=40.

**Supplementary Table 3. Reasons for Study Discontinuation in Reference to Product Use**

| Reason for Study Discontinuation                     | Last Product Used                     | Study Day |
|------------------------------------------------------|---------------------------------------|-----------|
| Voluntary withdrawal due to personal reasons         | IQOS (Controlled)                     | 4         |
| Voluntary withdrawal due to personal reasons         | UB Cigarette ( <i>Ad Libitum</i> )    | 4         |
| Voluntary withdrawal due to personal reasons         | UB Cigarette (Controlled)             | 2         |
| Adverse event (allergic reaction)                    | JUUL2 Prototype 40 mg/mL (Controlled) | 2         |
| Adverse event (infected insect bites)                | IQOS (Controlled)                     | 1         |
| Withdrawn at investigator's and sponsor's discretion | JUUL2 Prototype 18 mg/mL (Controlled) | 2         |

*Note.* N=6.

There were total five study days.

**Supplementary Table 4. Test Product Consumption in *Ad Libitum* and Controlled Use Sessions**

| Use Condition     | Product Consumption                                 | JUUL 59 mg/mL             | JUUL2 Prototype 18 mg/mL | JUUL2 Prototype 40 mg/mL | IQOS                    | UB Cigarette            |
|-------------------|-----------------------------------------------------|---------------------------|--------------------------|--------------------------|-------------------------|-------------------------|
| <i>Ad Libitum</i> | No. of Cigarettes or HeatSticks, Mean ( <i>SD</i> ) | —                         | —                        | —                        | 2.3 (0.47) <sup>a</sup> | 2.2 (0.49) <sup>a</sup> |
|                   | Net Weight Aerosolized (g), Mean ( <i>SD</i> )      | 0.03 (0.01) <sup>a</sup>  | 0.14 (0.06) <sup>b</sup> | 0.11 (0.05) <sup>c</sup> | —                       | —                       |
| Controlled        | No. of Cigarettes or HeatSticks, Mean ( <i>SD</i> ) | —                         | —                        | —                        | 1.0 (0.0)               | 1.0 (0.0)               |
|                   | Net Weight Aerosolized (g), Mean ( <i>SD</i> )      | 0.02 (0.004) <sup>a</sup> | 0.06 (0.01) <sup>b</sup> | 0.06 (0.02) <sup>b</sup> | —                       | —                       |

*Note.* JUUL, N=36; JUUL2 Prototype 18 mg/mL, N=37; JUUL2 Prototype 40 mg/mL, N=37; IQOS, N=38; UB Cigarette, N=36-37.

Net Weight Aerosolized (g) = [Pre-Weight (g) - Post-Weight (g)].

Test product means in the same row that do not share superscripts significantly differ ( $p < 0.05$ ).

**Supplementary Table 5.** mPES Subscale Scores of Test Products in *Ad Libitum* and Controlled Use Conditions

| Use Condition     | mPES Subscale | JUUL 59 mg/mL<br>Mean (SD) | JUUL2 Prototype<br>18 mg/mL<br>Mean (SD) | JUUL2 Prototype<br>40 mg/mL<br>Mean (SD) | IQOS<br>Mean (SD)        | UB Cigarette<br>Mean (SD) |
|-------------------|---------------|----------------------------|------------------------------------------|------------------------------------------|--------------------------|---------------------------|
| <i>Ad Libitum</i> | Satisfaction  | 3.63 (1.49) <sup>a</sup>   | 4.49 (1.43) <sup>b</sup>                 | 3.72 (1.67) <sup>a</sup>                 | 2.18 (1.44) <sup>c</sup> | 5.52 (0.96) <sup>d</sup>  |
|                   | Relief        | 3.29 (1.36) <sup>a</sup>   | 4.31 (1.32) <sup>b</sup>                 | 4.66 (1.54) <sup>b</sup>                 | 3.37 (1.51) <sup>a</sup> | 5.39 (1.30) <sup>c</sup>  |
|                   | Psychological | 2.87 (1.36) <sup>a</sup>   | 3.37 (1.49) <sup>b</sup>                 | 3.38 (1.51) <sup>b</sup>                 | 2.65 (1.23) <sup>a</sup> | 4.22 (1.46) <sup>c</sup>  |
|                   | Aversion      | 1.65 (0.85) <sup>a</sup>   | 1.92 (0.85) <sup>a</sup>                 | 2.81 (1.42) <sup>b</sup>                 | 2.51 (1.52) <sup>b</sup> | 2.76 (1.36) <sup>b</sup>  |
| <i>Controlled</i> | Satisfaction  | 3.53 (1.49) <sup>a</sup>   | 4.06 (1.76) <sup>a</sup>                 | 3.86 (1.69) <sup>a</sup>                 | 2.26 (1.36) <sup>b</sup> | 5.49 (1.18) <sup>c</sup>  |
|                   | Relief        | 3.51 (1.52) <sup>ac</sup>  | 3.86 (1.42) <sup>a</sup>                 | 4.43 (1.35) <sup>b</sup>                 | 3.31 (1.41) <sup>c</sup> | 5.24 (1.07) <sup>d</sup>  |
|                   | Psychological | 2.88 (1.56) <sup>a</sup>   | 3.08 (1.56) <sup>a</sup>                 | 3.19 (1.71) <sup>a</sup>                 | 2.42 (1.18) <sup>b</sup> | 4.19 (1.61) <sup>c</sup>  |
|                   | Aversion      | 1.69 (0.96) <sup>a</sup>   | 1.75 (1.01) <sup>a</sup>                 | 2.45 (1.17) <sup>b</sup>                 | 2.07 (0.93) <sup>c</sup> | 1.97 (1.00) <sup>ac</sup> |

Note. Abbreviations: mPES, modified Product Evaluation Scale.

JUUL, N=36; JUUL2 Prototype 18 mg/mL, N=37; JUUL2 Prototype 40 mg/mL, N=37; IQOS, N=38; UB Cigarette, N=37.

Test product means in the same row that do not share superscripts significantly differ ( $p < 0.05$ ).

mPES items were answered on seven-point response scales from 1 (“Not at all”) to 7 (“Extremely”).

**Supplementary Table 6.** Differences in mPES Subscales between Test Products by ENDS Use History

| Use Condition     | Outcome                                    | Test Product             | ENDS Never-Users    | ENDS Ever-Users     |
|-------------------|--------------------------------------------|--------------------------|---------------------|---------------------|
|                   |                                            |                          | (N=20)<br>Mean (SE) | (N=20)<br>Mean (SE) |
| <i>Ad Libitum</i> | mPES<br>“Psychological Reward”<br>Subscale | JUUL 59 mg/mL            | 2.92 (0.31)         | 2.81 (0.32)         |
|                   |                                            | JUUL2 Prototype 18 mg/mL | 2.81 (0.31)         | 3.92 (0.32)*        |
|                   |                                            | JUUL2 Prototype 40 mg/mL | 2.89 (0.31)         | 3.89 (0.32)*        |
|                   |                                            | IQOS                     | 2.58 (0.31)         | 2.73 (0.31)         |
|                   |                                            | UB Cigarette             | 3.79 (0.31)         | 4.67 (0.32)*        |

*Note.* Abbreviations: mPES, modified Product Evaluation Scale.

Values represent marginal means from mixed effects models with fixed effects of product, sequence, order ever-ENDS use and a test product × ENDS use interaction term.

\*Significantly greater than ENDS never-users.

mPES was answered on seven-point response scales from 1 (“Not at all”) to 7 (“Extremely”).

In the controlled use condition the test product × ENDS use interaction term was not significant for any of the mPES subscales ( $ps > 0.31$ ).

in the *ad libitum* use condition the test product × ENDS use interaction term was not significant for the “Satisfaction”, “Aversion” or “Relief” subscales ( $ps > 0.12$ ).



**Supplementary Table 7.** Study Emergent Adverse Events in *Ad Libitum* and Controlled Use Conditions

|                                            | JUUL 59 mg/mL<br>(N=36) | JUUL2 Prototype<br>18 mg/mL<br>(N=37) | JUUL2 Prototype<br>40 mg/mL<br>(N=37) | IQOS<br>(N=38) | UB Cigarette<br>(N=37) |
|--------------------------------------------|-------------------------|---------------------------------------|---------------------------------------|----------------|------------------------|
| Any SEAE                                   | 7 (19.4)                | 5 (13.5)                              | 12 (32.4)                             | 6 (15.8)       | 11 (29.7)              |
| Discontinued due to SEAE                   | 0                       | 0                                     | 1 (2.7)                               | 1 (2.6)        | 0                      |
| Serious SEAE                               | 0                       | 0                                     | 0                                     | 0              | 0                      |
| Maximum Severity <sup>a</sup>              |                         |                                       |                                       |                |                        |
| Mild                                       | 6 (16.7)                | 4 (10.8)                              | 9 (24.3)                              | 5 (13.2)       | 8 (21.6)               |
| Moderate                                   | 1 (2.8)                 | 1 (2.7)                               | 3 (8.1)                               | 1 (2.6)        | 2 (5.4)                |
| Severe                                     | 0                       | 0                                     | 0                                     | 0              | 1 (2.7)                |
| Relation to Study Product Use <sup>b</sup> |                         |                                       |                                       |                |                        |
| Not Related                                | 4 (11.1)                | 3 (8.1)                               | 0                                     | 2 (5.3)        | 3 (8.1)                |
| Unlikely Related                           | 1 (2.8)                 | 0                                     | 0                                     | 0              | 0                      |
| Possibly Related                           | 2 (5.6)                 | 2 (5.4)                               | 11 (29.7)                             | 4 (10.5)       | 8 (21.6)               |
| Likely Related                             | 0                       | 0                                     | 1 (2.7)                               | 0              | 0                      |
| Related                                    | 0                       | 0                                     | 0                                     | 0              | 0                      |
| Common Adverse Events                      |                         |                                       |                                       |                |                        |
| Dizziness                                  | 0                       | 0                                     | 4 (10.8)                              | 3 (7.9)        | 4 (10.8)               |
| Nausea                                     | 1 (2.8)                 | 0                                     | 1 (2.7)                               | 2 (5.3)        | 2 (5.4)                |
| Vomiting                                   | 1 (2.8)                 | 0                                     | 2 (5.4)                               | 0              | 0                      |
| Procedural dizziness                       | 0                       | 1 (2.7)                               | 2 (5.4)                               | 1 (2.6)        | 1 (2.7)                |
| Cough                                      | 0                       | 1 (2.7)                               | 3 (8.1)                               | 1 (2.6)        | 0                      |

Note. Abbreviations: SEAE, Study emergent adverse events.

All values represent N (%).

<sup>a</sup>Subcategories represent the maximum severity experienced by individual participants.

<sup>b</sup>Subcategories represent the strongest relation to product use experienced by individual participants.

**Supplementary Table 8.** Study Emergent Adverse Events in *Ad Libitum* Use Condition

|                                            | JUUL 59 mg/mL<br>(N=36) | JUUL2 Prototype<br>18 mg/mL<br>(N=37) | JUUL2 Prototype<br>40 mg/mL<br>(N=37) | IQOS<br>(N=38) | UB Cigarette<br>(N=37) |
|--------------------------------------------|-------------------------|---------------------------------------|---------------------------------------|----------------|------------------------|
| Any SEAE                                   | 1 (2.8)                 | 2 (5.4)                               | 11 (29.7)                             | 4 (10.5)       | 10 (27.0)              |
| Discontinued due to SEAE                   | 0                       | 0                                     | 0                                     | 0              | 0                      |
| Serious SEAE                               | 0                       | 0                                     | 0                                     | 0              | 0                      |
| Maximum Severity <sup>a</sup>              |                         |                                       |                                       |                |                        |
| Mild                                       | 0                       | 1 (2.7)                               | 8 (21.6)                              | 3 (7.9)        | 7 (18.9)               |
| Moderate                                   | 1 (2.8)                 | 1 (2.7)                               | 3 (8.1)                               | 1 (2.6)        | 0                      |
| Severe                                     | 0                       | 0                                     | 0                                     | 0              | 1 (2.7)                |
| Relation to Study Product Use <sup>b</sup> |                         |                                       |                                       |                |                        |
| Not Related                                | 0                       | 1 (2.7)                               | 0                                     | 1 (2.6)        | 3 (8.1)                |
| Unlikely Related                           | 0                       | 0                                     | 1 (2.7)                               | 0              | 0                      |
| Possibly Related                           | 1 (2.8)                 | 1 (2.7)                               | 9 (24.3)                              | 3 (7.9)        | 7 (18.9)               |
| Likely Related                             | 0                       | 0                                     | 1 (2.7)                               | 0              | 0                      |
| Related                                    | 0                       | 0                                     | 0                                     | 0              | 0                      |
| Common Adverse Events                      |                         |                                       |                                       |                |                        |
| Dizziness                                  | 0                       | 0                                     | 4 (10.8)                              | 3 (7.9)        | 4 (10.8)               |
| Nausea                                     | 1 (2.8)                 | 0                                     | 1 (2.7)                               | 2 (5.3)        | 2 (5.4)                |
| Vomiting                                   | 1 (2.8)                 | 0                                     | 2 (5.4)                               | 0              | 0                      |
| Procedural dizziness                       | 0                       | 1 (2.7)                               | 2 (5.4)                               | 1 (2.6)        | 1 (2.7)                |
| Cough                                      | 0                       | 0                                     | 2 (5.4)                               | 0              | 0                      |

*Note.* Abbreviations: SEAE, Study emergent adverse events.

All values represent N (%).

<sup>a</sup>Subcategories represent the maximum severity experienced by individual participants.

<sup>b</sup>Subcategories represent the strongest relation to product use experienced by individual participants.

**Supplementary Table 9.** Study Emergent Adverse Events in Controlled Use Condition

|                                            | JUUL 59 mg/mL<br>(N=36) | JUUL2 Prototype<br>18 mg/mL<br>(N=37) | JUUL2 Prototype<br>40 mg/mL<br>(N=37) | IQOS<br>(N=38) | UB Cigarette<br>(N=37) |
|--------------------------------------------|-------------------------|---------------------------------------|---------------------------------------|----------------|------------------------|
| Any SEAE                                   | 6 (16.7)                | 3 (8.1)                               | 5 (13.5)                              | 2 (5.3)        | 1 (2.7)                |
| Discontinued due to SEAE                   | 0                       | 0                                     | 1 (2.7)                               | 1 (2.6)        | 0                      |
| Serious SEAE                               | 0                       | 0                                     | 0                                     | 0              | 0                      |
| Maximum Severity <sup>a</sup>              |                         |                                       |                                       |                |                        |
| Mild                                       | 6 (16.7)                | 3 (8.1)                               | 5 (13.5)                              | 2 (5.3)        | 1 (2.7)                |
| Moderate                                   | 0                       | 0                                     | 0                                     | 0              | 0                      |
| Severe                                     | 0                       | 0                                     | 0                                     | 0              | 0                      |
| Relation to Study Product Use <sup>b</sup> |                         |                                       |                                       |                |                        |
| Not Related                                | 4 (11.1)                | 2 (5.4)                               | 0                                     | 1 (2.6)        | 0                      |
| Unlikely Related                           | 1 (2.8)                 | 0                                     | 0                                     | 0              | 0                      |
| Possibly Related                           | 1 (2.8)                 | 1 (2.7)                               | 5 (13.5)                              | 1 (2.6)        | 1 (2.7)                |
| Likely Related                             | 0                       | 0                                     | 0                                     | 0              | 0                      |
| Related                                    | 0                       | 0                                     | 0                                     | 0              | 0                      |
| Common Adverse Events                      |                         |                                       |                                       |                |                        |
| Dizziness                                  | 0                       | 0                                     | 1 (2.7)                               | 0              | 0                      |
| Nausea                                     | 0                       | 0                                     | 0                                     | 0              | 0                      |
| Vomiting                                   | 0                       | 0                                     | 0                                     | 0              | 0                      |
| Procedural dizziness                       | 0                       | 0                                     | 0                                     | 0              | 0                      |
| Cough                                      | 0                       | 1 (2.7)                               | 2 (5.4)                               | 1 (2.6)        | 0                      |

*Note.* Abbreviations: SEAE, Study emergent adverse events.

All values represent N (%).

<sup>a</sup>Subcategories represent the maximum severity experienced by individual participants.

<sup>b</sup>Subcategories represent the strongest relation to product use experienced by individual participants.
